# Supplementary material for: Analysis of Ku70 S155 Phospho-Specific BioID2 Interactome Identifies Ku Association with TRIP12 in Response to DNA Damage
Source: MDPI journal article supplement (doi:10.3390/ijms24087041), 2023-04-11

# SUPPLEMENTARY

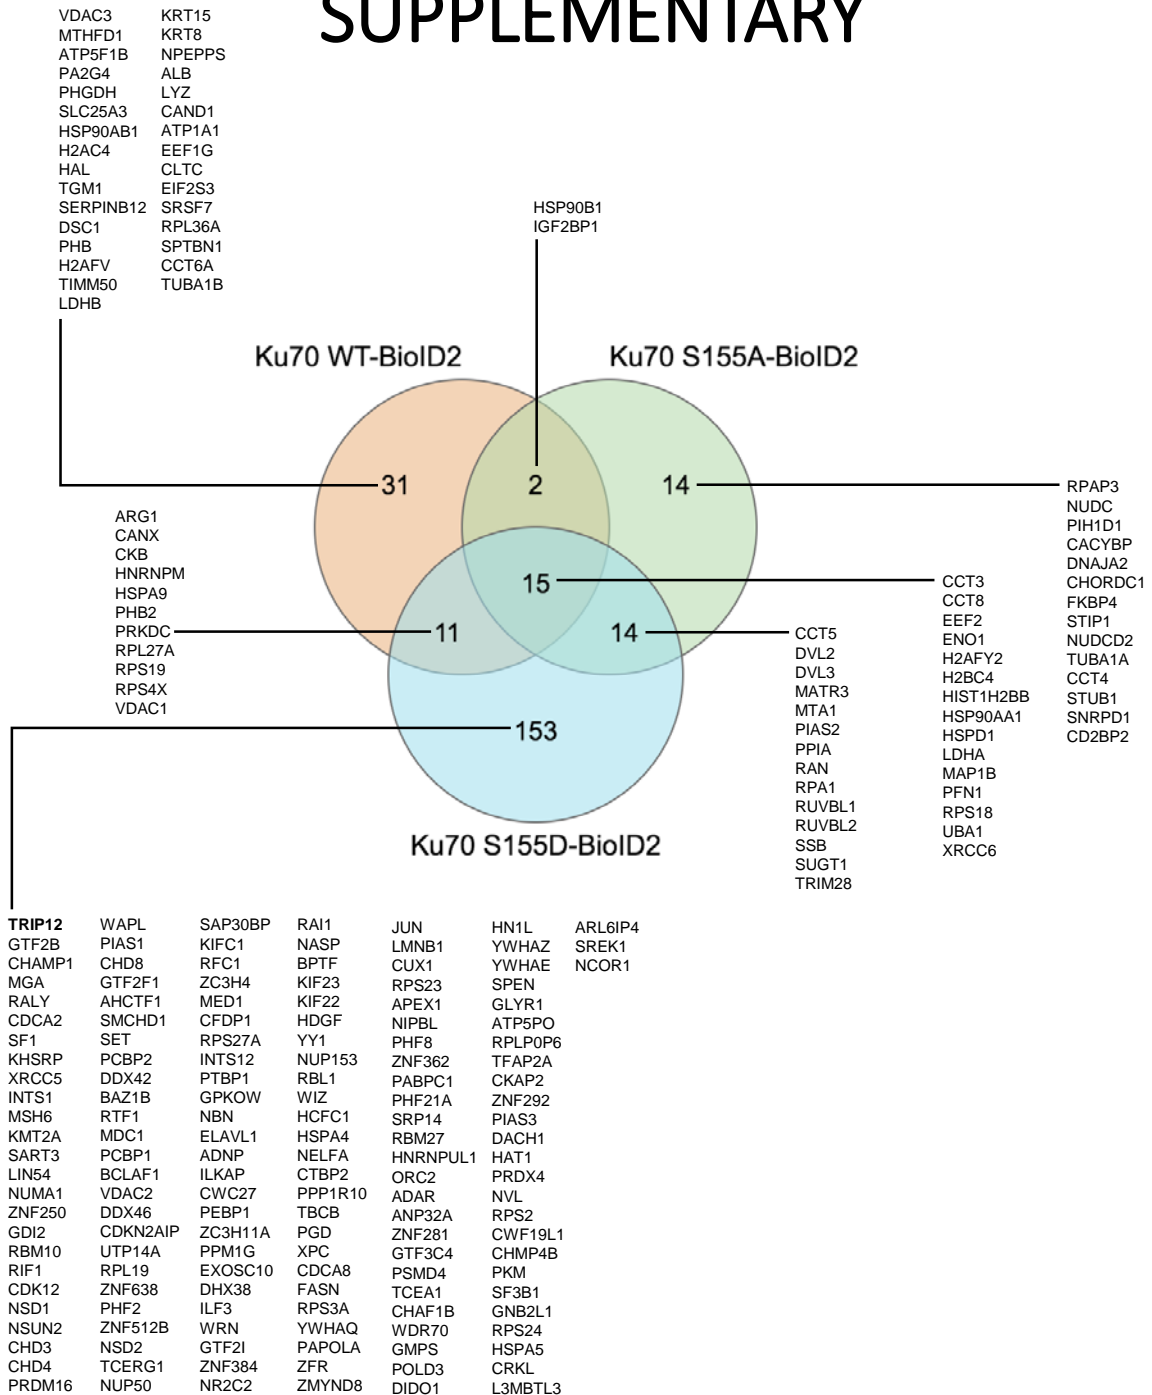

**Figure S1.** Three-way Venn diagram of wild-type Ku70-BioID2, Ku70 S155A-BioID2, and Ku70 S155D-BioID2 SAINTexpress protein candidates. Comparison was conducted with candidate proteins with a SAINTexpress score of  $\geq 0.6$  (candidate proteins listed for each cell line listed in Supplementary Table S3).

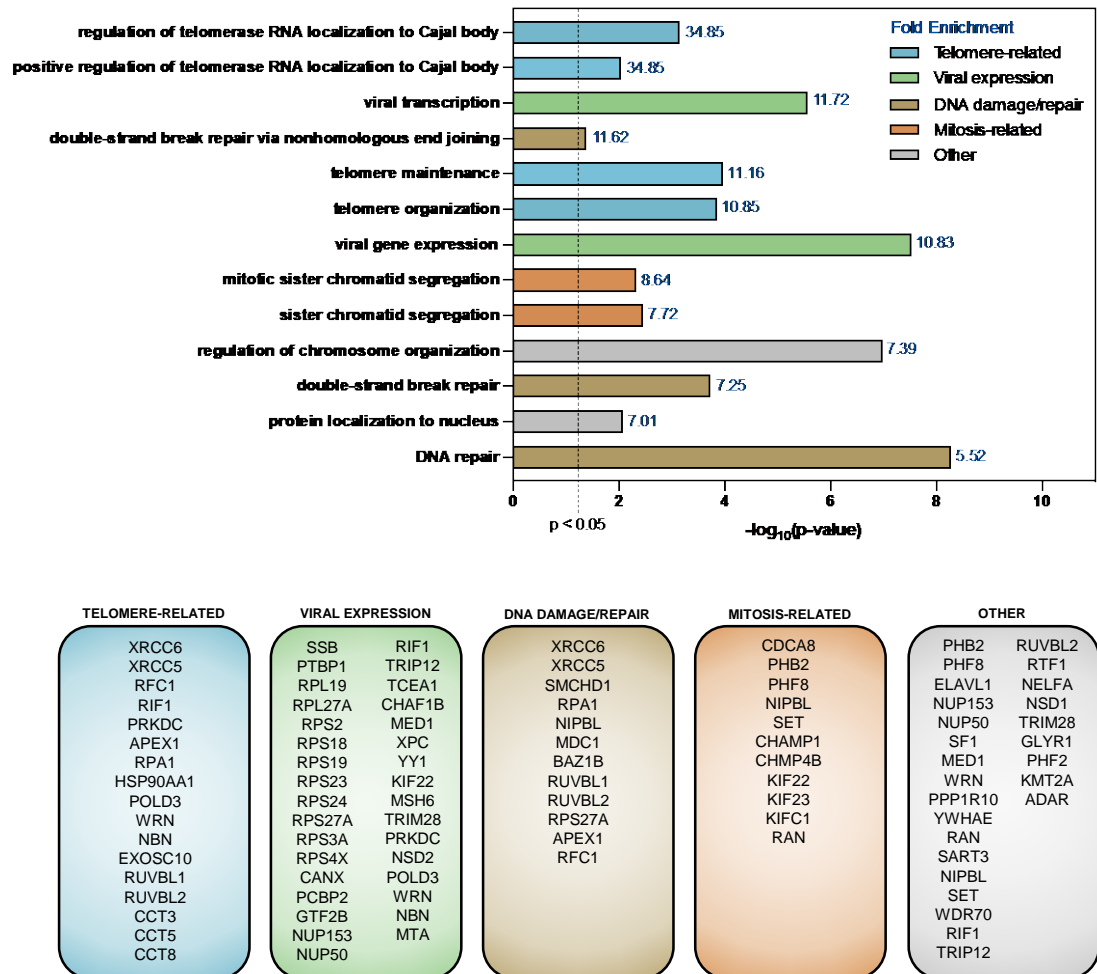

**Figure S2. Gene Ontology (GO) analysis of Ku70 S155D BiLD2 candidates.** GO enrichment analysis (Fisher's Exact test) by complete biological process was conducted for the 193 Ku70 S155D BiLD2 candidate proteins with a SAINTexpress score of  $\geq 0.6$ ; bar graph depicts a selection of significantly enriched biological processes ( $p < 0.05$ , using Bonferroni correction for multiple testing) with a fold-change  $\geq 5$ . Candidate proteins, indicated by gene name, identified for each grouping of GO biological processes.

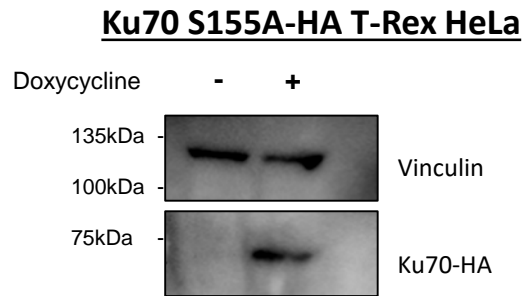

**Figure S3.** Induction of Ku70 S155A-HA T-Rex HeLa stable cell lines with or without 1  $\mu\text{g/mL}$  doxycycline for 24 hours before analyzing by Western blotting. Blots were probed with HA and vinculin antibodies.

**Supplementary Table S1A. Proteins appearing in three MS replicates of negative control – T-REx 293**

| Gene Name | Detailed Description                                         |
|-----------|--------------------------------------------------------------|
| ACACA     | Acetyl-CoA carboxylase 1                                     |
| PC        | Pyruvate carboxylase, mitochondrial                          |
| PCCA      | Propionyl-CoA carboxylase alpha chain, mitochondrial         |
| MCCC1     | Methylcrotonoyl-CoA carboxylase subunit alpha, mitochondrial |
| KRT10     | Keratin, type I cytoskeletal 10                              |
| MYH9      | Myosin-9                                                     |
| KRT1      | Keratin, type II cytoskeletal 1                              |
| KRT9      | Keratin, type I cytoskeletal 9                               |
| MYH10     | Myosin-10                                                    |
| KRT2      | Keratin, type II cytoskeletal 2 epidermal                    |
| ACACB     | Acetyl-CoA carboxylase 2                                     |
| RSL1D1    | Ribosomal L1 domain-containing protein 1                     |
| NOP56     | Nucleolar protein 56                                         |
| KRT5      | Keratin, type II cytoskeletal 5                              |
| TUBB      | Tubulin beta chain                                           |
| NOP2      | Putative ribosomal RNA methyltransferase NOP2                |
| KRT14     | Keratin, type I cytoskeletal 14                              |
| HIST1H1C  | Histone H1.2                                                 |
| KNOP1     | Lysine-rich nucleolar protein 1                              |
| TUBB4B    | Tubulin beta-4B chain                                        |
| HIST1H1E  | Histone H1.4                                                 |
| HSPA8     | Heat shock cognate 71 kDa protein                            |
| NOP58     | Nucleolar protein 58                                         |
| H2AFY     | Core histone macro-H2A.1                                     |
| TOP1      | DNA topoisomerase 1                                          |
| HSPA1A    | Heat shock 70 kDa protein 1A/1B                              |
| TCOF1     | Treacle protein                                              |
| ATP5A1    | ATP synthase subunit alpha, mitochondrial                    |
| KRT16     | Keratin, type I cytoskeletal 16                              |
| RPL6      | 60S ribosomal protein L6                                     |
| TOP2B     | DNA topoisomerase 2-beta                                     |
| DKC1      | H/ACA ribonucleoprotein complex subunit 4                    |
| PCCB      | Propionyl-CoA carboxylase beta chain, mitochondrial          |
| TUBA1B    | Tubulin alpha-1B chain                                       |
| PKM       | Pyruvate kinase PKM                                          |
| RPS8      | 40S ribosomal protein S8                                     |
| GNL3      | Guanine nucleotide-binding protein-like 3                    |
| EBNA1BP2  | Probable rRNA-processing protein EBP2                        |
| FTSJ3     | pre-rRNA processing protein FTSJ3                            |
| DHX9      | ATP-dependent RNA helicase A                                 |
| RPL7A     | 60S ribosomal protein L7a                                    |
| H2AFX     | Histone H2AX                                                 |
| HNRNPU    | Heterogeneous nuclear ribonucleoprotein U                    |
| H1FX      | Histone H1x                                                  |
| ACTB      | Actin, cytoplasmic 1                                         |
| ACTG1     | Actin, cytoplasmic 2                                         |
| RRS1      | Ribosome biogenesis regulatory protein homolog               |
| DSP       | Desmoplakin                                                  |
| HSP90AA1  | Heat shock protein HSP 90-alpha                              |
| KRT17     | Keratin, type I cytoskeletal 17                              |
| AP3D1     | AP-3 complex subunit delta-1                                 |
| DDX21     | Nucleolar RNA helicase 2                                     |
| TTF1      | Transcription termination factor 1                           |

|           |                                             |
|-----------|---------------------------------------------|
| SLC25A5   | ADP/ATP translocase 2                       |
| HIST1H2AJ | Histone H2A type 1-J                        |
| HIST1H2AH | Histone H2A type 1-H                        |
| H2AFJ     | Histone H2A.J                               |
| HIST1H2AD | Histone H2A type 1-D                        |
| HIST1H2AG | Histone H2A type 1                          |
| HIST1H2AC | Histone H2A type 1-C                        |
| HIST3H2A  | Histone H2A type 3                          |
| HIST1H2AB | Histone H2A type 1-B/E                      |
| H1F0      | Histone H1.0                                |
| HIST1H1A  | Histone H1.1                                |
| HSP90AB1  | Heat shock protein HSP 90-beta              |
| LARP7     | La-related protein 7                        |
| DDX18     | ATP-dependent RNA helicase DDX18            |
| PARP1     | Poly [ADP-ribose] polymerase 1              |
| LYAR      | Cell growth-regulating nucleolar protein    |
| RPL18     | 60S ribosomal protein L18                   |
| JUP       | Junction plakoglobin                        |
| MMTAG2    | Multiple myeloma tumor-associated protein 2 |
| GTPBP4    | Nucleolar GTP-binding protein 1             |
| KRT77     | Keratin, type II cytoskeletal 1b            |
| MTDH      | Protein LYRIC                               |
| RPL11     | 60S ribosomal protein L11                   |
| SON       | Protein SON                                 |
| RPL4      | 60S ribosomal protein L4                    |
| SUPT16H   | FACT complex subunit SPT16                  |
| VIM       | Vimentin                                    |
| RPF2      | Ribosome production factor 2 homolog        |
| GPATCH4   | G patch domain-containing protein 4         |
| PRSS1     | Trypsin-1                                   |
| TRY6      | Putative trypsin-6                          |
| HIST2H2BF | Histone H2B type 2-F                        |
| HIST1H2BH | Histone H2B type 1-H                        |
| HIST1H2BL | Histone H2B type 1-L                        |
| HIST1H2BC | Histone H2B type 1-C/E/F/G/I                |
| HIST1H2BM | Histone H2B type 1-M                        |
| HIST1H2BD | Histone H2B type 1-D                        |
| HIST1H2BN | Histone H2B type 1-N                        |
| HIST1H2BK | Histone H2B type 1-K                        |
| H2BFS     | Histone H2B type F-S                        |
| HLCS      | Biotin--protein ligase                      |
| HIST3H2BB | Histone H2B type 3-B                        |
| HIST1H2BO | Histone H2B type 1-O                        |
| HIST1H2BB | Histone H2B type 1-B                        |
| HIST1H2BJ | Histone H2B type 1-J                        |
| HIST2H2BE | Histone H2B type 2-E                        |
| HNRNPA1   | Heterogeneous nuclear ribonucleoprotein A1  |
| HSPA9     | Stress-70 protein, mitochondrial            |
| HNRNPH1   | Heterogeneous nuclear ribonucleoprotein H   |
| HIST1H4A  | Histone H4                                  |
| RPL23A    | 60S ribosomal protein L23a                  |
| KRT78     | Keratin, type II cytoskeletal 78            |
| HIST1H1B  | Histone H1.5                                |
| HSPA5     | 78 kDa glucose-regulated protein            |
| RBMX      | RNA-binding motif protein, X chromosome     |
| FAU       | 40S ribosomal protein S30                   |
| DSG1      | Desmoglein-1                                |
| RPS27A    | Ubiquitin-40S ribosomal protein S27a        |

|          |                                                                         |
|----------|-------------------------------------------------------------------------|
| RPL18A   | 60S ribosomal protein L18a                                              |
| RPS16    | 40S ribosomal protein S16                                               |
| PRPF4B   | Serine/threonine-protein kinase PRP4 homolog                            |
| MYBBP1A  | Myb-binding protein 1A                                                  |
| RPL7     | 60S ribosomal protein L7                                                |
| RPL29    | 60S ribosomal protein L29                                               |
| EEF1A1   | Elongation factor 1-alpha 1                                             |
| EEF1A1P5 | Putative elongation factor 1-alpha-like 3                               |
| RPL14    | 60S ribosomal protein L14                                               |
| HRNR     | Hornerin                                                                |
| GAPDH    | Glyceraldehyde-3-phosphate dehydrogenase                                |
| RBMX2    | RNA-binding motif protein, X-linked 2                                   |
| RPL15    | 60S ribosomal protein L15                                               |
| HP1BP3   | Heterochromatin protein 1-binding protein 3                             |
| RPS26    | 40S ribosomal protein S26                                               |
| HNRNPC   | Heterogeneous nuclear ribonucleoproteins C1/C2                          |
| H2AFY2   | Core histone macro-H2A.2                                                |
| SRRM2    | Serine/arginine repetitive matrix protein 2                             |
| RPL8     | 60S ribosomal protein L8                                                |
| RPS9     | 40S ribosomal protein S9                                                |
| PRDX4    | Peroxiredoxin-4                                                         |
| RPL27    | 60S ribosomal protein L27                                               |
| PTBP1    | Polypyrimidine tract-binding protein 1                                  |
| PTPLAD1  | Very-long-chain (3R)-3-hydroxyacyl-[acyl-carrier protein] dehydratase 3 |
| KRI1     | Protein KRI1 homolog                                                    |
| RPL19    | 60S ribosomal protein L19                                               |
| RBM34    | RNA-binding protein 34                                                  |
| VDAC1    | Voltage-dependent anion-selective channel protein 1                     |
| CTTN     | Src substrate cortactin                                                 |
| HNRNPK   | Heterogeneous nuclear ribonucleoprotein K                               |
| RRP1B    | Ribosomal RNA processing protein 1 homolog B                            |
| RPL27A   | 60S ribosomal protein L27a                                              |
| RPL13    | 60S ribosomal protein L13                                               |
| SNRPD1   | Small nuclear ribonucleoprotein Sm D1                                   |
| SOX1     | Transcription factor SOX-1                                              |
| LDHA     | L-lactate dehydrogenase A chain                                         |
| RPL31    | 60S ribosomal protein L31                                               |
| RPL22    | 60S ribosomal protein L22                                               |
| EIF5B    | Eukaryotic translation initiation factor 5B                             |
| PFN1     | Profilin-1                                                              |
| SRP72    | Signal recognition particle subunit SRP72                               |
| DDX3X    | ATP-dependent RNA helicase DDX3X                                        |
| GNL2     | Nucleolar GTP-binding protein 2                                         |
| VDAC2    | Voltage-dependent anion-selective channel protein 2                     |
| RPL36AL  | 60S ribosomal protein L36a-like                                         |
| MAP1B    | Microtubule-associated protein 1B                                       |
| HIST1H3A | Histone H3.1                                                            |
| RPL13A   | 60S ribosomal protein L13a                                              |
| SRSF11   | Serine/arginine-rich splicing factor 11                                 |
| RPL24    | 60S ribosomal protein L24                                               |
| RPL7L1   | 60S ribosomal protein L7-like 1                                         |
| DEK      | Protein DEK                                                             |
| RPL3     | 60S ribosomal protein L3                                                |
| FLG2     | Filaggrin-2                                                             |
| SRRM1    | Serine/arginine repetitive matrix protein 1                             |
| YWHAE    | 14-3-3 protein epsilon                                                  |
| SURF6    | Surfeit locus protein 6                                                 |
| PPIA     | Peptidyl-prolyl cis-trans isomerase A                                   |

|           |                                                          |
|-----------|----------------------------------------------------------|
| HNRNPA2B1 | Heterogeneous nuclear ribonucleoproteins A2/B1           |
| CDSN      | Corneodesmosin                                           |
| WDR36     | WD repeat-containing protein 36                          |
| CCDC71    | Coiled-coil domain-containing protein 71                 |
| GNB2L1    | Guanine nucleotide-binding protein subunit beta-2-like 1 |
| SRSF7     | Serine/arginine-rich splicing factor 7                   |
| RPL34     | 60S ribosomal protein L34                                |
| RBBP6     | E3 ubiquitin-protein ligase RBBP6                        |
| FUS       | RNA-binding protein FUS                                  |
| ASPM      | Abnormal spindle-like microcephaly-associated protein    |
| USP42     | Ubiquitin carboxyl-terminal hydrolase 42                 |
| RPL39P5   | Putative 60S ribosomal protein L39-like 5                |
| RPL39     | 60S ribosomal protein L39                                |
| RPS25     | 40S ribosomal protein S25                                |
| PHGDH     | D-3-phosphoglycerate dehydrogenase                       |
| KTN1      | Kinectin                                                 |
| TNFRSF1B  | Tumor necrosis factor receptor superfamily member 1B     |
| LLPH      | Protein LLP homolog                                      |
| RPS24     | 40S ribosomal protein S24                                |
| RPL10A    | 60S ribosomal protein L10a                               |
| CDK13     | Cyclin-dependent kinase 13                               |
| MECP2     | Methyl-CpG-binding protein 2                             |
| SLAIN2    | SLAIN motif-containing protein 2                         |
| RPL5      | 60S ribosomal protein L5                                 |
| ZCCHC17   | Nucleolar protein of 40 kDa                              |
| ARGLU1    | Arginine and glutamate-rich protein 1                    |

---

**Supplementary Table S1B. Proteins appearing in three MS replicates of negative control – NLS-BioID2**

| Gene Name | Detailed Description                                             |
|-----------|------------------------------------------------------------------|
| KRT9      | Keratin, type I cytoskeletal 9                                   |
| KRT1      | Keratin, type II cytoskeletal 1                                  |
| KRT10     | Keratin, type I cytoskeletal 10                                  |
| KRT2      | Keratin, type II cytoskeletal 2 epidermal                        |
| MKI67     | Antigen KI-67                                                    |
| TCOF1     | Treacle protein                                                  |
| NAT10     | N-acetyltransferase 10                                           |
| NOL6      | Nucleolar protein 6                                              |
| NCL       | Nucleolin                                                        |
| RBBP6     | E3 ubiquitin-protein ligase RBBP6                                |
| KRT14     | Keratin, type I cytoskeletal 14                                  |
| BRD2      | Bromodomain-containing protein 2                                 |
| NONO      | Non-POU domain-containing octamer-binding protein                |
| KRT6A     | Keratin, type II cytoskeletal 6A                                 |
| KRT5      | Keratin, type II cytoskeletal 5                                  |
| KNOP1     | Lysine-rich nucleolar protein 1                                  |
| KRT6C     | Keratin, type II cytoskeletal 6C                                 |
| HNRNPA2B1 | Heterogeneous nuclear ribonucleoproteins A2/B1                   |
| TOP2A     | DNA topoisomerase 2-alpha                                        |
| PARP1     | Poly [ADP-ribose] polymerase 1                                   |
| FLNA      | Filamin-A                                                        |
| TOP2B     | DNA topoisomerase 2-beta                                         |
| TMPO      | Lamina-associated polypeptide 2, isoforms beta/gamma             |
| KRT6B     | Keratin, type II cytoskeletal 6B                                 |
| RSL1D1    | Ribosomal L1 domain-containing protein 1                         |
| NOP2      | Putative ribosomal RNA methyltransferase NOP2                    |
| KRT16     | Keratin, type I cytoskeletal 16                                  |
| DDX3X     | ATP-dependent RNA helicase DDX3X                                 |
| DDX21     | Nucleolar RNA helicase 2                                         |
| PHIP      | PH-interacting protein                                           |
| HNRNPA1   | Heterogeneous nuclear ribonucleoprotein A1                       |
| RBM34     | RNA-binding protein 34                                           |
| HNRNPK    | Heterogeneous nuclear ribonucleoprotein K                        |
| DSP       | Desmoplakin                                                      |
| FTSJ3     | pre-rRNA processing protein FTSJ3                                |
| HRNR      | Hornerin                                                         |
| DDX50     | ATP-dependent RNA helicase DDX50                                 |
| MYBBP1A   | Myb-binding protein 1A                                           |
| SON       | Protein SON                                                      |
| NPM1      | Nucleophosmin                                                    |
| GPATCH4   | G patch domain-containing protein 4                              |
| RRP1B     | Ribosomal RNA processing protein 1 homolog B                     |
| HNRNPR    | Heterogeneous nuclear ribonucleoprotein R                        |
| NOP58     | Nucleolar protein 58                                             |
| SFPQ      | Splicing factor, proline- and glutamine-rich                     |
| PRPF4B    | Serine/threonine-protein kinase PRP4 homolog                     |
| TAGLN2    | Transgelin-2                                                     |
| NIFK      | MKI67 FHA domain-interacting nucleolar phosphoprotein            |
| KRT17     | Keratin, type I cytoskeletal 17                                  |
| PPP1CC    | Serine/threonine-protein phosphatase PP1-gamma catalytic subunit |
| EBNA1BP2  | Probable rRNA-processing protein EBP2                            |
| HIST2H2AB | Histone H2A type 2-B                                             |



|           |                                                                    |
|-----------|--------------------------------------------------------------------|
| H2AFY     | Core histone macro-H2A.1                                           |
| TPX2      | Targeting protein for Xklp2                                        |
| DDX18     | ATP-dependent RNA helicase DDX18                                   |
| AHCTF1    | Protein ELYS                                                       |
| DDX17     | Probable ATP-dependent RNA helicase DDX17                          |
| RRBP1     | Ribosome-binding protein 1                                         |
| KRI1      | Protein KRI1 homolog                                               |
| DHX15     | Putative pre-mRNA-splicing factor ATP-dependent RNA helicase DHX15 |
| NOLC1     | Nucleolar and coiled-body phosphoprotein 1                         |
| TTF1      | Transcription termination factor 1                                 |
| PPM1G     | Protein phosphatase 1G                                             |
| ANXA2     | Annexin A2                                                         |
| NSFL1C    | NSFL1 cofactor p47                                                 |
| THOC2     | THO complex subunit 2                                              |
| DNAJB1    | DnaJ homolog subfamily B member 1                                  |
| BRD3      | Bromodomain-containing protein 3                                   |
| GNL2      | Nucleolar GTP-binding protein 2                                    |
| SF3B1     | Splicing factor 3B subunit 1                                       |
| BUD13     | BUD13 homolog                                                      |
| HNRNPU    | Heterogeneous nuclear ribonucleoprotein U                          |
| SRRM1     | Serine/arginine repetitive matrix protein 1                        |
| HIST1H2AJ | Histone H2A type 1-J                                               |
| HIST1H2AH | Histone H2A type 1-H                                               |
| HIST1H2AD | Histone H2A type 1-D                                               |
| HIST1H2AG | Histone H2A type 1                                                 |
| HIST1H2AC | Histone H2A type 1-C                                               |
| HIST3H2A  | Histone H2A type 3                                                 |
| HIST1H2AB | Histone H2A type 1-B/E                                             |
| H2AFJ     | Histone H2A.J                                                      |
| CCDC43    | Coiled-coil domain-containing protein 43                           |
| WDR70     | WD repeat-containing protein 70                                    |
| LYAR      | Cell growth-regulating nucleolar protein                           |
| WDR46     | WD repeat-containing protein 46                                    |
| PCMT1     | Protein-L-isoaspartate(D-aspartate) O-methyltransferase            |
| DDX42     | ATP-dependent RNA helicase DDX42                                   |
| FHL1      | Four and a half LIM domains protein 1                              |
| CEBPZ     | CCAAT/enhancer-binding protein zeta                                |
| HMGXB4    | HMG domain-containing protein 4                                    |
| DDX55     | ATP-dependent RNA helicase DDX55                                   |
| DKC1      | H/ACA ribonucleoprotein complex subunit 4                          |
| JUP       | Junction plakoglobin                                               |
| GPKOW     | G patch domain and KOW motifs-containing protein                   |
| SF3B2     | Splicing factor 3B subunit 2                                       |
| ZC3H18    | Zinc finger CCCH domain-containing protein 18                      |
| DSG1      | Desmoglein-1                                                       |
| SART1     | U4/U6.U5 tri-snRNP-associated protein 1                            |
| TAF3      | Transcription initiation factor TFIID subunit 3                    |
| SNW1      | SNW domain-containing protein 1                                    |
| KRT78     | Keratin, type II cytoskeletal 78                                   |
| CFDP1     | Craniofacial development protein 1                                 |
| MTDH      | Protein LYRIC                                                      |
| HNRNPA3   | Heterogeneous nuclear ribonucleoprotein A3                         |
| UBE2M     | NEDD8-conjugating enzyme Ubc12                                     |
| U2SURP    | U2 snRNP-associated SURP motif-containing protein                  |
| TXNL1     | Thioredoxin-like protein 1                                         |
| U2AF2     | Splicing factor U2AF 65 kDa subunit                                |
| FUS       | RNA-binding protein FUS                                            |

|           |                                                            |
|-----------|------------------------------------------------------------|
| KRT77     | Keratin, type II cytoskeletal 1b                           |
| CBX5      | Chromobox protein homolog 5                                |
| NACA      | Nascent polypeptide-associated complex subunit alpha       |
| SRRM2     | Serine/arginine repetitive matrix protein 2                |
| FRG1      | Protein FRG1                                               |
| MDC1      | Mediator of DNA damage checkpoint protein 1                |
| LARP7     | La-related protein 7                                       |
| PSPC1     | Paraspeckle component 1                                    |
| DDX24     | ATP-dependent RNA helicase DDX24                           |
| HIST1H2BC | Histone H2B type 1-C/E/F/G/I                               |
| HIST2H2BF | Histone H2B type 2-F                                       |
| HIST1H2BM | Histone H2B type 1-M                                       |
| HIST1H2BD | Histone H2B type 1-D                                       |
| HIST1H2BN | Histone H2B type 1-N                                       |
| HIST1H2BL | Histone H2B type 1-L                                       |
| HIST1H2BH | Histone H2B type 1-H                                       |
| HIST1H2BK | Histone H2B type 1-K                                       |
| H2BFS     | Histone H2B type F-S                                       |
| CXorf56   | UPF0428 protein Cxorf56                                    |
| CTTN      | Src substrate cortactin                                    |
| PINX1     | PIN2/TERF1-interacting telomerase inhibitor 1              |
| PDS5A     | Sister chromatid cohesion protein PDS5 homolog A           |
| TCEB3     | Transcription elongation factor B polypeptide 3            |
| SCAF1     | Splicing factor, arginine/serine-rich 19                   |
| NOP56     | Nucleolar protein 56                                       |
| H2AFV     | Histone H2A.V                                              |
| H2AFZ     | Histone H2A.Z                                              |
| ZNF711    | Zinc finger protein 711                                    |
| BMS1      | Ribosome biogenesis protein BMS1 homolog                   |
| PHF2      | Lysine-specific demethylase PHF2                           |
| HIST1H2BO | Histone H2B type 1-O                                       |
| HIST1H2BB | Histone H2B type 1-B                                       |
| HIST1H2BJ | Histone H2B type 1-J                                       |
| HIST2H2BE | Histone H2B type 2-E                                       |
| TARDBP    | TAR DNA-binding protein 43                                 |
| TOP1      | DNA topoisomerase 1                                        |
| DNTTIP2   | Deoxynucleotidyltransferase terminal-interacting protein 2 |
| BBX       | HMG box transcription factor BBX                           |
| BAZ1B     | Tyrosine-protein kinase BAZ1B                              |
| SUPT16H   | FACT complex subunit SPT16                                 |
| HN1       | Hematological and neurological expressed 1 protein         |
| EIF5B     | Eukaryotic translation initiation factor 5B                |
| MECP2     | Methyl-CpG-binding protein 2                               |
| DHX9      | ATP-dependent RNA helicase A                               |
| USP39     | U4/U6.U5 tri-snRNP-associated protein 2                    |
| GPALPP1   | GPALPP motifs-containing protein 1                         |
| RSBN1L    | Round spermatid basic protein 1-like protein               |
| KIN       | DNA/RNA-binding protein KIN17                              |
| HNRNPA0   | Heterogeneous nuclear ribonucleoprotein A0                 |
| WIBG      | Partner of Y14 and mago                                    |
| C12orf43  | Uncharacterized protein C12orf43                           |
| KRT15     | Keratin, type I cytoskeletal 15                            |
| TCERG1    | Transcription elongation regulator 1                       |
| MED1      | Mediator of RNA polymerase II transcription subunit 1      |
| RBM25     | RNA-binding protein 25                                     |
| GNL3      | Guanine nucleotide-binding protein-like 3                  |
| CSNK1A1   | Casein kinase I isoform alpha                              |

|          |                                                                                  |
|----------|----------------------------------------------------------------------------------|
| HIST1H4A | Histone H4                                                                       |
| SSRP1    | FACT complex subunit SSRP1                                                       |
| EXOSC10  | Exosome component 10                                                             |
| KRT13    | Keratin, type I cytoskeletal 13                                                  |
| SAFB     | Scaffold attachment factor B1                                                    |
| THRAP3   | Thyroid hormone receptor-associated protein 3                                    |
| PCNP     | PEST proteolytic signal-containing nuclear protein                               |
| DDX46    | Probable ATP-dependent RNA helicase DDX46                                        |
| KRT4     | Keratin, type II cytoskeletal 4                                                  |
| PSIP1    | PC4 and SFRS1-interacting protein                                                |
| DHX29    | ATP-dependent RNA helicase DHX29                                                 |
| ABCF1    | ATP-binding cassette sub-family F member 1                                       |
| H1FO     | Histone H1.0                                                                     |
| ZC3H11A  | Zinc finger CCCH domain-containing protein 11A                                   |
| NAP1L1   | Nucleosome assembly protein 1-like 1                                             |
| CD2BP2   | CD2 antigen cytoplasmic tail-binding protein 2                                   |
| HIST1H1E | Histone H1.4                                                                     |
| RBMX     | RNA-binding motif protein, X chromosome                                          |
| SMCHD1   | Structural maintenance of chromosomes flexible hinge domain-containing protein 1 |
| SMAP     | Small acidic protein                                                             |
| PPIL4    | Peptidyl-prolyl cis-trans isomerase-like 4                                       |
| RPL4     | 60S ribosomal protein L4                                                         |
| RPL6     | 60S ribosomal protein L6                                                         |
| EIF5A    | Eukaryotic translation initiation factor 5A-1                                    |
| HDGFRP2  | Hepatoma-derived growth factor-related protein 2                                 |
| TUBA1B   | Tubulin alpha-1B chain                                                           |
| EXOSC9   | Exosome complex component RRP45                                                  |
| CBX3     | Chromobox protein homolog 3                                                      |
| CCDC137  | Coiled-coil domain-containing protein 137                                        |
| LRRC59   | Leucine-rich repeat-containing protein 59                                        |
| ANKRD11  | Ankyrin repeat domain-containing protein 11                                      |
| DEK      | Protein DEK                                                                      |
| C1orf52  | UPF0690 protein C1orf52                                                          |
| LTV1     | Protein LTV1 homolog                                                             |
| PC       | Pyruvate carboxylase, mitochondrial                                              |
| KRT80    | Keratin, type II cytoskeletal 80                                                 |
| SUGP2    | SURP and G-patch domain-containing protein 2                                     |
| HNRNPDL  | Heterogeneous nuclear ribonucleoprotein D-like                                   |
| UTP14A   | U3 small nucleolar RNA-associated protein 14 homolog A                           |
| COIL     | Coilin                                                                           |
| HP1BP3   | Heterochromatin protein 1-binding protein 3                                      |
| PRDX1    | Peroxiredoxin-1                                                                  |
| BRD7     | Bromodomain-containing protein 7                                                 |
| FLG2     | Filaggrin-2                                                                      |
| AP3D1    | AP-3 complex subunit delta-1                                                     |
| C19orf43 | Uncharacterized protein C19orf43                                                 |
| YY1      | Transcriptional repressor protein YY1                                            |
| LUC7L3   | Luc7-like protein 3                                                              |
| RPL14    | 60S ribosomal protein L14                                                        |
| DDX27    | Probable ATP-dependent RNA helicase DDX27                                        |
| SAP30BP  | SAP30-binding protein                                                            |
| TAF2     | Transcription initiation factor TFIID subunit 2                                  |
| PDAP1    | 28 kDa heat- and acid-stable phosphoprotein                                      |
| ZNF638   | Zinc finger protein 638                                                          |
| HNRNPF   | Heterogeneous nuclear ribonucleoprotein F                                        |
| MMTAG2   | Multiple myeloma tumor-associated protein 2                                      |

|          |                                                                   |
|----------|-------------------------------------------------------------------|
| ANXA1    | Annexin A1                                                        |
| PAPD5    | PAP-associated domain-containing protein 5                        |
| TRIM28   | Transcription intermediary factor 1-beta                          |
| ADNP     | Activity-dependent neuroprotector homeobox protein                |
| NOL8     | Nucleolar protein 8                                               |
| SBSN     | Suprabasin                                                        |
| LBR      | Lamin-B receptor                                                  |
| ACTG1    | Actin, cytoplasmic 2                                              |
| ACTB     | Actin, cytoplasmic 1                                              |
| BCLAF1   | Bcl-2-associated transcription factor 1                           |
| POLR1E   | DNA-directed RNA polymerase I subunit RPA49                       |
| HNRNPD   | Heterogeneous nuclear ribonucleoprotein D0                        |
| GAPDH    | Glyceraldehyde-3-phosphate dehydrogenase                          |
| NUP50    | Nuclear pore complex protein Nup50                                |
| RANGAP1  | Ran GTPase-activating protein 1                                   |
| CCDC86   | Coiled-coil domain-containing protein 86                          |
| RPS8     | 40S ribosomal protein S8                                          |
| PRSS1    | Trypsin-1                                                         |
| TRY6     | Putative trypsin-6                                                |
| PKP1     | Plakophilin-1                                                     |
| STMN1    | Stathmin                                                          |
| NOC3L    | Nucleolar complex protein 3 homolog                               |
| ACIN1    | Apoptotic chromatin condensation inducer in the nucleus           |
| UBA52    | Ubiquitin-60S ribosomal protein L40                               |
| RPS27A   | Ubiquitin-40S ribosomal protein S27a                              |
| UBB      | Polyubiquitin-B                                                   |
| UBC      | Polyubiquitin-C                                                   |
| EEF1A1P5 | Putative elongation factor 1-alpha-like 3                         |
| EEF1A1   | Elongation factor 1-alpha 1                                       |
| RPS10    | 40S ribosomal protein S10                                         |
| DDX52    | Probable ATP-dependent RNA helicase DDX52                         |
| ZRANB2   | Zinc finger Ran-binding domain-containing protein 2               |
| NPM3     | Nucleoplasmin-3                                                   |
| HNRNPH1  | Heterogeneous nuclear ribonucleoprotein H                         |
| SUB1     | Activated RNA polymerase II transcriptional coactivator p15       |
| NUCKS1   | Nuclear ubiquitous casein and cyclin-dependent kinase substrate 1 |
| HNRNPC   | Heterogeneous nuclear ribonucleoproteins C1/C2                    |
| NHP2     | H/ACA ribonucleoprotein complex subunit 2                         |
| TGM3     | Protein-glutamine gamma-glutamyltransferase E                     |
| KRT24    | Keratin, type I cytoskeletal 24                                   |
| APEX1    | DNA-(apurinic or apyrimidinic site) lyase                         |
| VIM      | Vimentin                                                          |
| HMGA1    | High mobility group protein HMG-I/HMG-Y                           |
| KRT84    | Keratin, type II cuticular Hb4                                    |
| ZCCHC17  | Nucleolar protein of 40 kDa                                       |
| HSPA5    | 78 kDa glucose-regulated protein                                  |
| PCBP2    | Poly(rC)-binding protein 2                                        |
| HMGB3    | High mobility group protein B3                                    |
| HNRNPAB  | Heterogeneous nuclear ribonucleoprotein A/B                       |
| C1orf131 | Uncharacterized protein C1orf131                                  |
| SURF6    | Surfeit locus protein 6                                           |
| RPL18    | 60S ribosomal protein L18                                         |
| CWC27    | Peptidyl-prolyl cis-trans isomerase CWC27 homolog                 |
| RP9      | Retinitis pigmentosa 9 protein                                    |
| RPL29    | 60S ribosomal protein L29                                         |
| CAT      | Catalase                                                          |
| CASP14   | Caspase-14                                                        |

|          |                                                                   |
|----------|-------------------------------------------------------------------|
| DSC1     | Desmocollin-1                                                     |
| FBL      | rRNA 2'-O-methyltransferase fibrillarin                           |
| DCD      | Dermcidin                                                         |
| KRT12    | Keratin, type I cytoskeletal 12                                   |
| RPL23A   | 60S ribosomal protein L23a                                        |
| H1FX     | Histone H1x                                                       |
| HSPA1A   | Heat shock 70 kDa protein 1A/1B                                   |
| MAP1B    | Microtubule-associated protein 1B                                 |
| ILKAP    | Integrin-linked kinase-associated serine/threonine phosphatase 2C |
| CDK11A   | Cyclin-dependent kinase 11A                                       |
| CDK11B   | Cyclin-dependent kinase 11B                                       |
| RPL19    | 60S ribosomal protein L19                                         |
| PRDX2    | Peroxiredoxin-2                                                   |
| TUBB     | Tubulin beta chain                                                |
| RIF1     | Telomere-associated protein RIF1                                  |
| CDSN     | Corneodesmosin                                                    |
| CHD4     | Chromodomain-helicase-DNA-binding protein 4                       |
| BUD31    | Protein BUD31 homolog                                             |
| S100A8   | Protein S100-A8                                                   |
| PARN     | Poly(A)-specific ribonuclease PARN                                |
| TUBB4B   | Tubulin beta-4B chain                                             |
| INTS12   | Integrator complex subunit 12                                     |
| CDC5L    | Cell division cycle 5-like protein                                |
| ANP32C   | Acidic leucine-rich nuclear phosphoprotein 32 family member C     |
| ANP32A   | Acidic leucine-rich nuclear phosphoprotein 32 family member A     |
| SSB      | Lupus La protein                                                  |
| RPS25    | 40S ribosomal protein S25                                         |
| HSPA8    | Heat shock cognate 71 kDa protein                                 |
| PPIA     | Peptidyl-prolyl cis-trans isomerase A                             |
| GTPBP4   | Nucleolar GTP-binding protein 1                                   |
| NGDN     | Neuroguidin                                                       |
| RPL24    | 60S ribosomal protein L24                                         |
| HSP90AB1 | Heat shock protein HSP 90-beta                                    |
| MLLT6    | Protein AF-17                                                     |
| GAR1     | H/ACA ribonucleoprotein complex subunit 1                         |
| RRP15    | RRP15-like protein                                                |
| EDF1     | Endothelial differentiation-related factor 1                      |
| SRSF7    | Serine/arginine-rich splicing factor 7                            |
| TXN      | Thioredoxin                                                       |
| FAU      | 40S ribosomal protein S30                                         |
| C11orf57 | Uncharacterized protein C11orf57                                  |
| PFN1     | Profilin-1                                                        |
| GK3P     | Putative glycerol kinase 3                                        |
| GK       | Glycerol kinase                                                   |
| TGM1     | Protein-glutamine gamma-glutamyltransferase K                     |
| H3F3A    | Histone H3.3                                                      |
| HIST2H3A | Histone H3.2                                                      |
| HIST1H3A | Histone H3.1                                                      |
| HIST3H3  | Histone H3.1t                                                     |
| H3F3C    | Histone H3.3C                                                     |
| SHOX2    | Short stature homeobox protein 2                                  |
| CBX1     | Chromobox protein homolog 1                                       |
| POF1B    | Protein POF1B                                                     |
| TUFM     | Elongation factor Tu, mitochondrial                               |
| HDAC1    | Histone deacetylase 1                                             |
| LLPH     | Protein LLP homolog                                               |
| PIAS2    | E3 SUMO-protein ligase PIAS2                                      |

|           |                                                                   |
|-----------|-------------------------------------------------------------------|
| ALB       | Serum albumin                                                     |
| GSDMA     | Gasdermin-A                                                       |
| XP32      | Skin-specific protein 32                                          |
| ATP5A1    | ATP synthase subunit alpha, mitochondrial                         |
| HAL       | Histidine ammonia-lyase                                           |
| ATXN3     | Ataxin-3                                                          |
| PIN4      | Peptidyl-prolyl cis-trans isomerase NIMA-interacting 4            |
| IGF2BP1   | Insulin-like growth factor 2 mRNA-binding protein 1               |
| CHAMP1    | Chromosome alignment-maintaining phosphoprotein 1                 |
| PHF6      | PHD finger protein 6                                              |
| SERPINB12 | Serpin B12                                                        |
| PKM       | Pyruvate kinase PKM                                               |
| NOP14     | Nucleolar protein 14                                              |
| EIF3C     | Eukaryotic translation initiation factor 3 subunit C              |
| EIF3CL    | Eukaryotic translation initiation factor 3 subunit C-like protein |
| LMNA      | Prelamin-A/C                                                      |
| USP31     | Ubiquitin carboxyl-terminal hydrolase 31                          |
| RPS16     | 40S ribosomal protein S16                                         |
| DCP2      | m7GpppN-mRNA hydrolase                                            |
| POU4F2    | POU domain, class 4, transcription factor 2                       |
| DNAH17    | Dynein heavy chain 17, axonemal                                   |

---

**Supplementary Table S2A. BioID2 candidates exclusive to Ku70 S155A using first filtering approach, appearing in three MS replicates.**

| Gene Name | Detailed Description                   |
|-----------|----------------------------------------|
| RPAP3     | RNA polymerase II-associated protein 3 |
| NUDCD2    | NudC domain-containing protein 2       |
| C20orf27  | UPF0687 protein C20orf27               |

**Supplementary Table S2B. BioID2 candidates exclusive to Ku70 S155D using first filtering approach, that appearing in three MS replicates.**

| Gene Name | Detailed Description                                     |
|-----------|----------------------------------------------------------|
| WHSC1     | Histone-lysine N-methyltransferase NSD2                  |
| CHD3      | Chromodomain-helicase-DNA-binding protein 3              |
| ZFR       | Zinc finger RNA-binding protein                          |
| MPG       | DNA-3-methyladenine glycosylase                          |
| HNRNPUL1  | Heterogeneous nuclear ribonucleoprotein U-like protein 1 |
| CBX8      | Chromobox protein homolog 8                              |
| DDX5      | Probable ATP-dependent RNA helicase DDX5                 |
| ARG1      | Arginase-1                                               |
| ZNF512    | Zinc finger protein 512                                  |
| PHF8      | Histone lysine demethylase PHF8                          |
| ZNF362    | Zinc finger protein 362                                  |
| DACH1     | Dachshund homolog 1                                      |
| C5orf24   | UPF0461 protein C5orf24                                  |
| YWHAZ     | 14-3-3 protein zeta/delta                                |
| C10orf12  | Uncharacterized protein C10orf12                         |
| CTCF      | Transcriptional repressor CTCF                           |
| ATRX      | Transcriptional regulator ATRX                           |
| BLM       | Bloom syndrome protein                                   |
| SCML2     | Sex comb on midleg-like protein 2                        |
| YLP1      | YLP motif-containing protein 1                           |
| ATP5O     | ATP synthase subunit O, mitochondrial                    |
| USP36     | Ubiquitin carboxyl-terminal hydrolase 36                 |
| ZNF292    | Zinc finger protein 292                                  |
| PDCD11    | Protein RRP5 homolog                                     |
| SEN3      | Sentrin-specific protease 3                              |
| ATAD5     | ATPase family AAA domain-containing protein 5            |
| WDR18     | WD repeat-containing protein 18                          |
| CWF19L2   | CWF19-like protein 2                                     |
| CDCA8     | Borealin                                                 |
| BPTF      | Nucleosome-remodeling factor subunit BPTF                |
| ATP1A1    | Sodium/potassium-transporting ATPase subunit alpha-1     |
| WRN       | Werner syndrome ATP-dependent helicase                   |
| ZNF280D   | Zinc finger protein 280D                                 |
| SMARCA2   | Probable global transcription activator SNF2L2           |
| TFAP2A    | Transcription factor AP-2-alpha                          |
| TRIP12    | E3 ubiquitin-protein ligase TRIP12                       |
| MDH2      | Malate dehydrogenase, mitochondrial                      |
| CAND1     | Cullin-associated NEDD8-dissociated protein 1            |
| CHERP     | Calcium homeostasis endoplasmic reticulum protein        |
| EWSR1     | RNA-binding protein EWS                                  |
| UBE2E1    | Ubiquitin-conjugating enzyme E2 E1                       |
| MLLT1     | Protein ENL                                              |
| SLX4      | Structure-specific endonuclease subunit SLX4             |
| ZFP91     | E3 ubiquitin-protein ligase ZFP91                        |
| TAGLN3    | Transgelin-3                                             |
| C1orf174  | UPF0688 protein C1orf174                                 |
| ZNF24     | Zinc finger protein 24                                   |
| RAB10     | Ras-related protein Rab-10                               |
| POGZ      | Pogo transposable element with ZNF domain                |
| WIZ       | Protein Wiz                                              |
| MSH2      | DNA mismatch repair protein Msh2                         |
| TEX10     | Testis-expressed sequence 10 protein                     |
| RAI1      | Retinoic acid-induced protein 1                          |



|       |                                              |
|-------|----------------------------------------------|
| CCAR2 | Cell cycle and apoptosis regulator protein 2 |
| KIF22 | Kinesin-like protein KIF22                   |
| SRSF2 | Serine/arginine-rich splicing factor 2       |
| SRSF8 | Serine/arginine-rich splicing factor 8       |
| NSA2  | Ribosome biogenesis protein NSA2 homolog     |

---

**Supplementary Table S3A. SAINTexpress candidates scoring greater than or equal to 0.6 – wild-type Ku70-BioID2.**

\*1 = in BioGRID, 0 = not in BioGRID

| Gene Name | SAINTexpress Score | BioGRID |
|-----------|--------------------|---------|
| ENO1      | 1                  | 1       |
| HSPD1     | 1                  | 0       |
| XRCC6     | 1                  | 1       |
| VDAC3     | 1                  | 0       |
| ARG1      | 1                  | 0       |
| RPS19     | 1                  | 0       |
| RPS18     | 1                  | 0       |
| MTHFD1    | 0.99               | 0       |
| ATP5F1B   | 0.99               | 0       |
| PA2G4     | 0.99               | 0       |
| HSP90B1   | 0.98               | 0       |
| PHGDH     | 0.98               | 0       |
| SLC25A3   | 0.98               | 0       |
| RPS4X     | 0.97               | 0       |
| HNRNPM    | 0.97               | 0       |
| HSPA9     | 0.96               | 0       |
| PFN1      | 0.95               | 0       |
| HSP90AB1  | 0.94               | 0       |
| H2AC4     | 0.92               | 1       |
| HAL       | 0.91               | 0       |
| TGM1      | 0.9                | 0       |
| UBA1      | 0.9                | 0       |
| SERPINB12 | 0.9                | 0       |
| RPL27A    | 0.89               | 0       |
| DSC1      | 0.88               | 0       |
| HIST1H2BB | 0.86               | 0       |
| PHB       | 0.85               | 1       |
| H2AFV     | 0.85               | 0       |
| TIMM50    | 0.81               | 0       |
| HSP90AA1  | 0.81               | 0       |
| VDAC1     | 0.8                | 1       |
| PRKDC     | 0.79               | 1       |
| H2BC4     | 0.79               | 0       |
| LDHB      | 0.78               | 0       |
| PHB2      | 0.73               | 1       |
| KRT15     | 0.69               | 0       |
| KRT8      | 0.67               | 0       |
| NPEPPS    | 0.66               | 0       |
| ALB       | 0.66               | 0       |
| EEF2      | 0.66               | 1       |
| H2AFY2    | 0.66               | 0       |
| CANX      | 0.66               | 0       |
| LYZ       | 0.66               | 0       |
| CAND1     | 0.66               | 1       |
| LDHA      | 0.66               | 0       |
| CCT8      | 0.65               | 1       |
| CCT3      | 0.65               | 1       |
| ATP1A1    | 0.65               | 0       |
| IGF2BP1   | 0.65               | 0       |
| EEF1G     | 0.65               | 0       |
| CLTC      | 0.65               | 1       |
| EIF2S3    | 0.64               | 0       |

| Gene Name | SAINTexpress Score | BioGRID |
|-----------|--------------------|---------|
| SRSF7     | 0.64               | 1       |
| MAP1B     | 0.64               | 0       |
| RPL36A    | 0.64               | 0       |
| SPTBN1    | 0.64               | 0       |
| CCT6A     | 0.63               | 0       |
| TUBA1B    | 0.63               | 0       |
| CKB       | 0.62               | 0       |

**Supplementary Table S3B. SAINTexpress candidates scoring greater than or equal to 0.6 – Ku70 S155A-BioID2.**

\*1 = in BioGRID, 0 = not in BioGRID

| Gene Name | SAINTexpress Score | BioGRID |
|-----------|--------------------|---------|
| CCT8      | 1                  | 1       |
| XRCC6     | 1                  | 1       |
| RPAP3     | 1                  | 0       |
| RUVBL2    | 1                  | 0       |
| NUDC      | 0.99               | 0       |
| DVL2      | 0.99               | 0       |
| PIH1D1    | 0.99               | 1       |
| CACYBP    | 0.98               | 0       |
| SSB       | 0.97               | 1       |
| DNAJA2    | 0.97               | 0       |
| HSPD1     | 0.97               | 0       |
| DVL3      | 0.94               | 0       |
| ENO1      | 0.91               | 1       |
| SUGT1     | 0.88               | 0       |
| CHORDC1   | 0.84               | 0       |
| UBA1      | 0.83               | 0       |
| HIST1H2BB | 0.82               | 0       |
| PFN1      | 0.75               | 0       |
| H2BC4     | 0.75               | 0       |
| HSP90AA1  | 0.69               | 0       |
| FKBP4     | 0.67               | 0       |
| RUVBL1    | 0.67               | 1       |
| MAP1B     | 0.67               | 0       |
| HSP90B1   | 0.66               | 0       |
| EEF2      | 0.66               | 1       |
| PPIA      | 0.66               | 0       |
| RPA1      | 0.66               | 1       |
| LDHA      | 0.66               | 0       |
| STIP1     | 0.65               | 0       |
| RAN       | 0.65               | 0       |
| NUDCD2    | 0.65               | 0       |
| IGF2BP1   | 0.65               | 0       |
| MATR3     | 0.65               | 1       |
| H2AFY2    | 0.65               | 0       |
| MTA1      | 0.65               | 0       |
| TUBA1A    | 0.65               | 0       |
| CCT3      | 0.64               | 1       |
| CCT4      | 0.64               | 0       |
| CCT5      | 0.64               | 0       |
| STUB1     | 0.64               | 0       |
| PIAS2     | 0.64               | 1       |
| RPS18     | 0.64               | 0       |
| SNRPD1    | 0.63               | 0       |
| TRIM28    | 0.61               | 1       |
| CD2BP2    | 0.6                | 0       |

**Supplementary Table S3C. SAINTexpress candidates scoring greater than or equal to 0.6 – Ku70 S155D-BioID2.**

\*1 = in BioGRID, 0 = not in BioGRID

| Gene Name | SAINTexpress Score | BioGRID | Gene Name | SAINTexpress Score | BioGRID |
|-----------|--------------------|---------|-----------|--------------------|---------|
| CCT8      | 1                  | 1       | CCT5      | 0.97               | 0       |
| GTF2B     | 1                  | 0       | SET       | 0.97               | 1       |
| CHAMP1    | 1                  | 1       | PIAS2     | 0.97               | 1       |
| MGA       | 1                  | 1       | PFN1      | 0.96               | 0       |
| RALY      | 1                  | 1       | UBA1      | 0.95               | 0       |
| CDCA2     | 1                  | 0       | PCBP2     | 0.94               | 0       |
| EEF2      | 1                  | 1       | TRIM28    | 0.93               | 1       |
| SF1       | 1                  | 1       | DDX42     | 0.92               | 1       |
| KHSRP     | 1                  | 1       | BAZ1B     | 0.91               | 1       |
| SSB       | 1                  | 1       | RTF1      | 0.91               | 1       |
| XRCC5     | 1                  | 1       | MDC1      | 0.9                | 1       |
| XRCC6     | 1                  | 1       | VDAC1     | 0.9                | 1       |
| INTS1     | 1                  | 0       | PCBP1     | 0.89               | 1       |
| MSH6      | 1                  | 1       | BCLAF1    | 0.89               | 1       |
| KMT2A     | 1                  | 0       | VDAC2     | 0.88               | 0       |
| RPA1      | 1                  | 1       | DDX46     | 0.87               | 1       |
| SART3     | 1                  | 1       | RPL27A    | 0.87               | 0       |
| LIN54     | 1                  | 0       | CDKN2AIP  | 0.87               | 0       |
| NUMA1     | 1                  | 1       | UTP14A    | 0.86               | 1       |
| ZNF250    | 1                  | 0       | RPL19     | 0.86               | 0       |
| RPS19     | 1                  | 0       | ZNF638    | 0.85               | 1       |
| RUVBL2    | 1                  | 0       | CKB       | 0.85               | 0       |
| GDI2      | 0.99               | 0       | PHF2      | 0.84               | 0       |
| RBM10     | 0.99               | 1       | ZNF512B   | 0.84               | 1       |
| RIF1      | 0.99               | 1       | NSD2      | 0.84               | 0       |
| CDK12     | 0.99               | 1       | TCERG1    | 0.83               | 1       |
| TRIP12    | 0.99               | 1       | NUP50     | 0.83               | 1       |
| RAN       | 0.99               | 0       | SAP30BP   | 0.82               | 1       |
| NSD1      | 0.99               | 0       | KIFC1     | 0.82               | 0       |
| ENO1      | 0.99               | 1       | RFC1      | 0.81               | 1       |
| NSUN2     | 0.99               | 0       | ZC3H4     | 0.8                | 1       |
| MATR3     | 0.99               | 1       | MED1      | 0.8                | 1       |
| HSPD1     | 0.99               | 0       | CFDP1     | 0.8                | 1       |
| CHD3      | 0.99               | 1       | RPS27A    | 0.79               | 0       |
| CHD4      | 0.99               | 1       | INTS12    | 0.79               | 0       |
| PRDM16    | 0.99               | 0       | PTBP1     | 0.79               | 0       |
| NCOR1     | 0.99               | 1       | GPKOW     | 0.78               | 0       |
| WAPL      | 0.99               | 1       | NBN       | 0.78               | 0       |
| PIAS1     | 0.99               | 0       | ELAVL1    | 0.76               | 0       |
| RPS18     | 0.99               | 0       | ADNP      | 0.75               | 1       |
| MTA1      | 0.99               | 0       | ILKAP     | 0.74               | 0       |
| CHD8      | 0.99               | 1       | HSPA9     | 0.73               | 0       |
| GTF2F1    | 0.98               | 0       | CWC27     | 0.73               | 0       |
| AHCTF1    | 0.98               | 1       | PEBP1     | 0.72               | 0       |
| DVL2      | 0.98               | 0       | ZC3H11A   | 0.71               | 1       |
| DVL3      | 0.98               | 0       | PPM1G     | 0.71               | 1       |
| SMCHD1    | 0.98               | 1       | SUGT1     | 0.7                | 0       |

| Gene Name | SAINTexpress Score | BioGRID |
|-----------|--------------------|---------|
| EXOSC10   | 0.68               | 1       |
| DHX38     | 0.68               | 1       |
| ILF3      | 0.68               | 1       |
| WRN       | 0.67               | 1       |
| GTF2I     | 0.67               | 1       |
| ZNF384    | 0.67               | 0       |
| NR2C2     | 0.67               | 1       |
| RAI1      | 0.67               | 0       |
| NASP      | 0.67               | 1       |
| BPTF      | 0.67               | 1       |
| KIF23     | 0.67               | 1       |
| KIF22     | 0.67               | 0       |
| HDGF      | 0.67               | 1       |
| YY1       | 0.67               | 1       |
| LDHA      | 0.67               | 0       |
| NUP153    | 0.67               | 1       |
| RBL1      | 0.67               | 0       |
| WIZ       | 0.67               | 1       |
| HCFC1     | 0.67               | 1       |
| HSPA4     | 0.66               | 0       |
| H2AFY2    | 0.66               | 0       |
| NELFA     | 0.66               | 0       |
| CTBP2     | 0.66               | 1       |
| PPP1R10   | 0.66               | 1       |
| TBCB      | 0.66               | 0       |
| PGD       | 0.66               | 0       |
| XPC       | 0.66               | 1       |
| CDCA8     | 0.66               | 0       |
| RUVBL1    | 0.66               | 1       |
| FASN      | 0.66               | 0       |
| RPS3A     | 0.66               | 0       |
| YWHAQ     | 0.66               | 0       |
| PAPOLA    | 0.66               | 1       |
| ZFR       | 0.66               | 1       |
| RPS4X     | 0.66               | 0       |
| ZMYND8    | 0.66               | 1       |
| JUN       | 0.66               | 1       |
| MAP1B     | 0.66               | 0       |
| LMNB1     | 0.66               | 0       |
| CUX1      | 0.66               | 0       |
| RPS23     | 0.66               | 0       |
| APEX1     | 0.66               | 1       |
| NIPBL     | 0.66               | 0       |
| PHF8      | 0.66               | 0       |
| CANX      | 0.66               | 0       |
| ZNF362    | 0.66               | 1       |
| PABPC1    | 0.66               | 0       |
| PHF21A    | 0.66               | 0       |
| SRP14     | 0.66               | 0       |
| ARG1      | 0.66               | 0       |
| RBM27     | 0.66               | 1       |
| HNRNPUL1  | 0.66               | 0       |
| ORC2      | 0.66               | 1       |
| ADAR      | 0.66               | 1       |

| Gene Name | SAINTexpress Score | BioGRID |
|-----------|--------------------|---------|
| ANP32A    | 0.65               | 0       |
| ZNF281    | 0.65               | 1       |
| GTF3C4    | 0.65               | 1       |
| CCT3      | 0.65               | 1       |
| PSMD4     | 0.65               | 1       |
| TCEA1     | 0.65               | 0       |
| CHAF1B    | 0.65               | 0       |
| WDR70     | 0.65               | 1       |
| GMPS      | 0.65               | 0       |
| POLD3     | 0.65               | 0       |
| DIDO1     | 0.65               | 1       |
| HNRNPM    | 0.65               | 0       |
| HN1L      | 0.65               | 0       |
| YWHAZ     | 0.65               | 1       |
| YWHAE     | 0.65               | 0       |
| SPEN      | 0.65               | 1       |
| GLYR1     | 0.65               | 1       |
| ATP5PO    | 0.65               | 0       |
| RPLP0P6   | 0.65               | 0       |
| PPIA      | 0.65               | 0       |
| TFAP2A    | 0.65               | 1       |
| CKAP2     | 0.65               | 0       |
| ZNF292    | 0.65               | 0       |
| HIST1H2BB | 0.65               | 0       |
| PIAS3     | 0.65               | 0       |
| DACH1     | 0.65               | 1       |
| HAT1      | 0.64               | 1       |
| PRDX4     | 0.64               | 0       |
| HSP90AA1  | 0.64               | 0       |
| NVL       | 0.63               | 1       |
| RPS2      | 0.63               | 0       |
| CWF19L1   | 0.63               | 0       |
| H2BC4     | 0.63               | 0       |
| CHMP4B    | 0.62               | 0       |
| PKM       | 0.62               | 0       |
| SF3B1     | 0.62               | 1       |
| GNB2L1    | 0.62               | 0       |
| RPS24     | 0.62               | 0       |
| HSPA5     | 0.61               | 1       |
| CRKL      | 0.61               | 1       |
| L3MBTL3   | 0.61               | 0       |
| ARL6IP4   | 0.61               | 0       |
| PRKDC     | 0.6                | 1       |
| SREK1     | 0.6                | 0       |
| PHB2      | 0.6                | 1       |

Uncropped blots

**Figure 1a.** Cell lines induced with or without 1  $\mu\text{g/mL}$  doxycycline for 24 hours before analyzing by Western blotting. All Western blots depicted show 50  $\mu\text{g}$  of whole cell extracts (WCE).

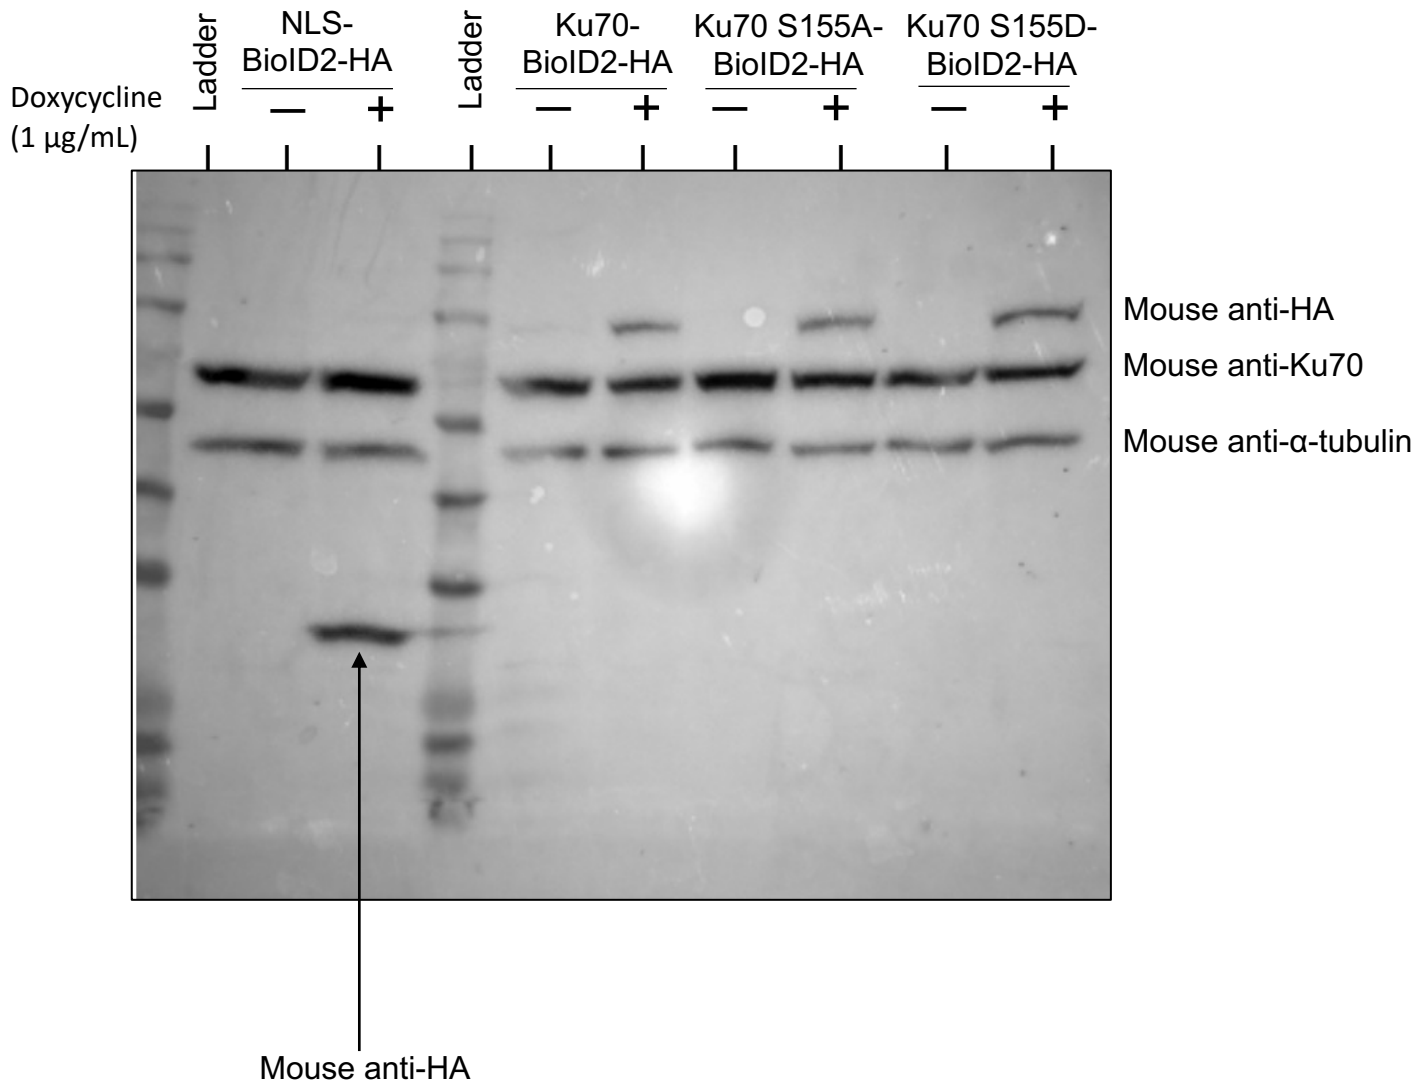

Note: Same blot probed with HA, Ku70,  $\alpha$ -tubulin

**Figure 1b.** Time course following doxycycline induction (1  $\mu\text{g/mL}$ ) of Ku70 S155A-BioID2-HA and Ku70 S155D-BioID2-HA. All Western blots depicted show 50  $\mu\text{g}$  of whole cell extracts (WCE).

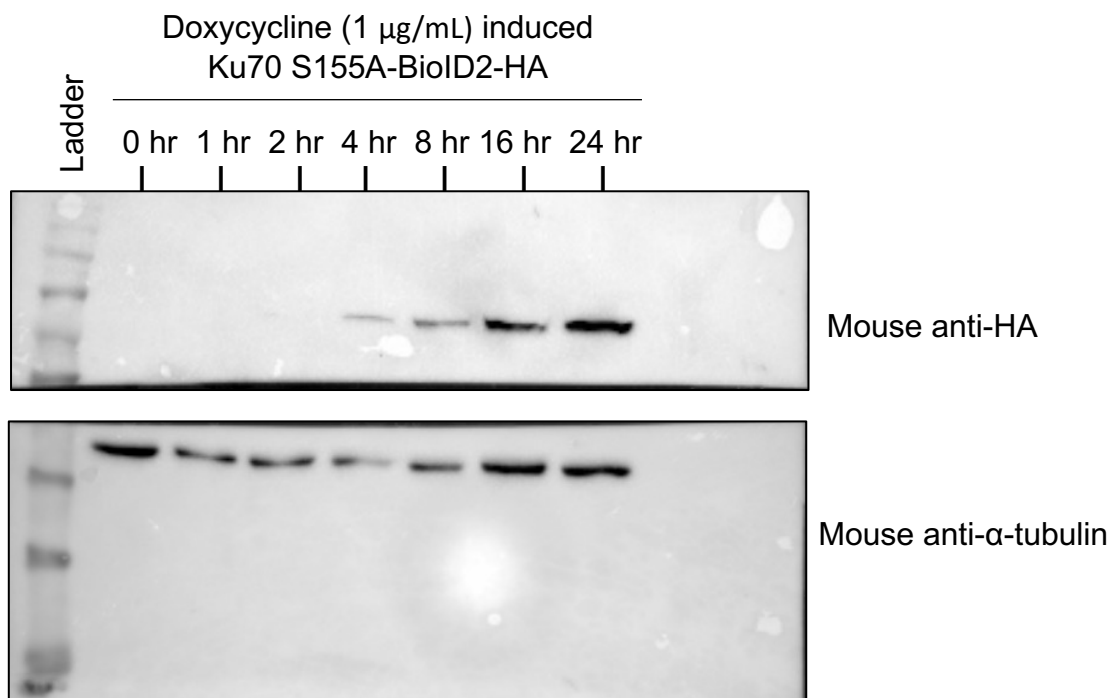

Note: Same blot probed with HA and  $\alpha$ -tubulin

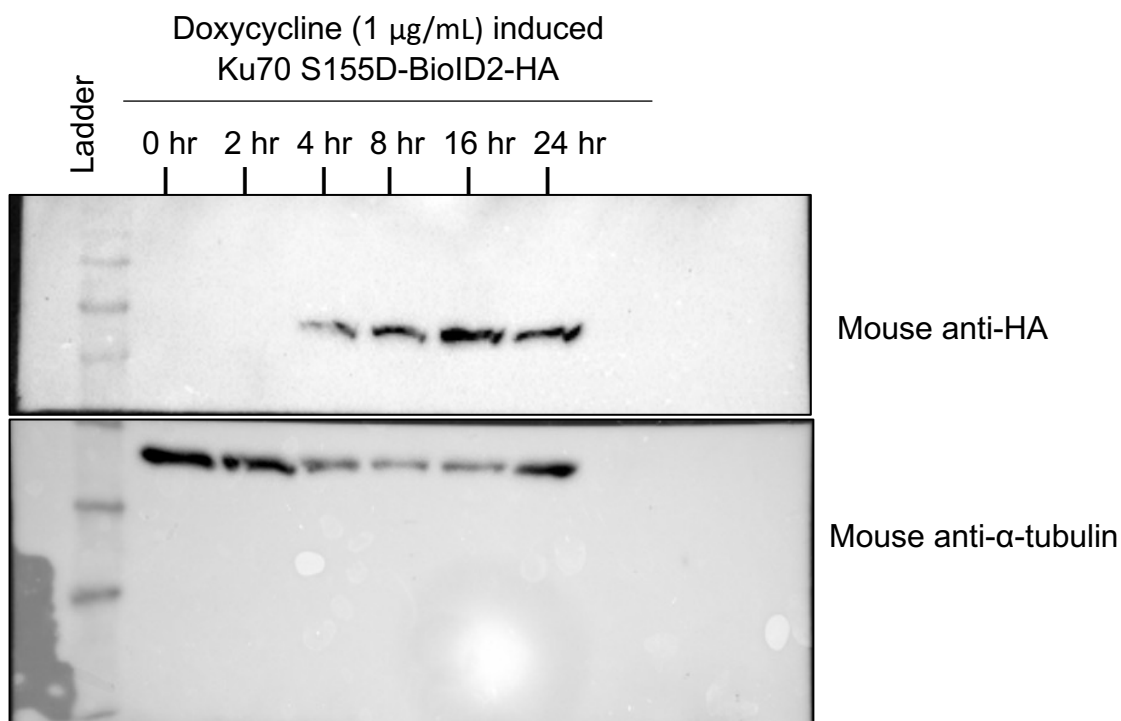

Note: Same blot probed with HA and  $\alpha$ -tubulin



**Figure 1d.** Biotinylation of doxycycline (1  $\mu\text{g/mL}$ )-induced stable cell lines. After 8 hr of doxycycline-induction, cell lines were supplemented with or without biotin (50  $\mu\text{M}$ ) for 24 hours prior to analysis by Western blotting (50  $\mu\text{g}$  of WCE). Streptavidin blots are a separate gel loaded identically in parallel with same samples as HA, tubulin.

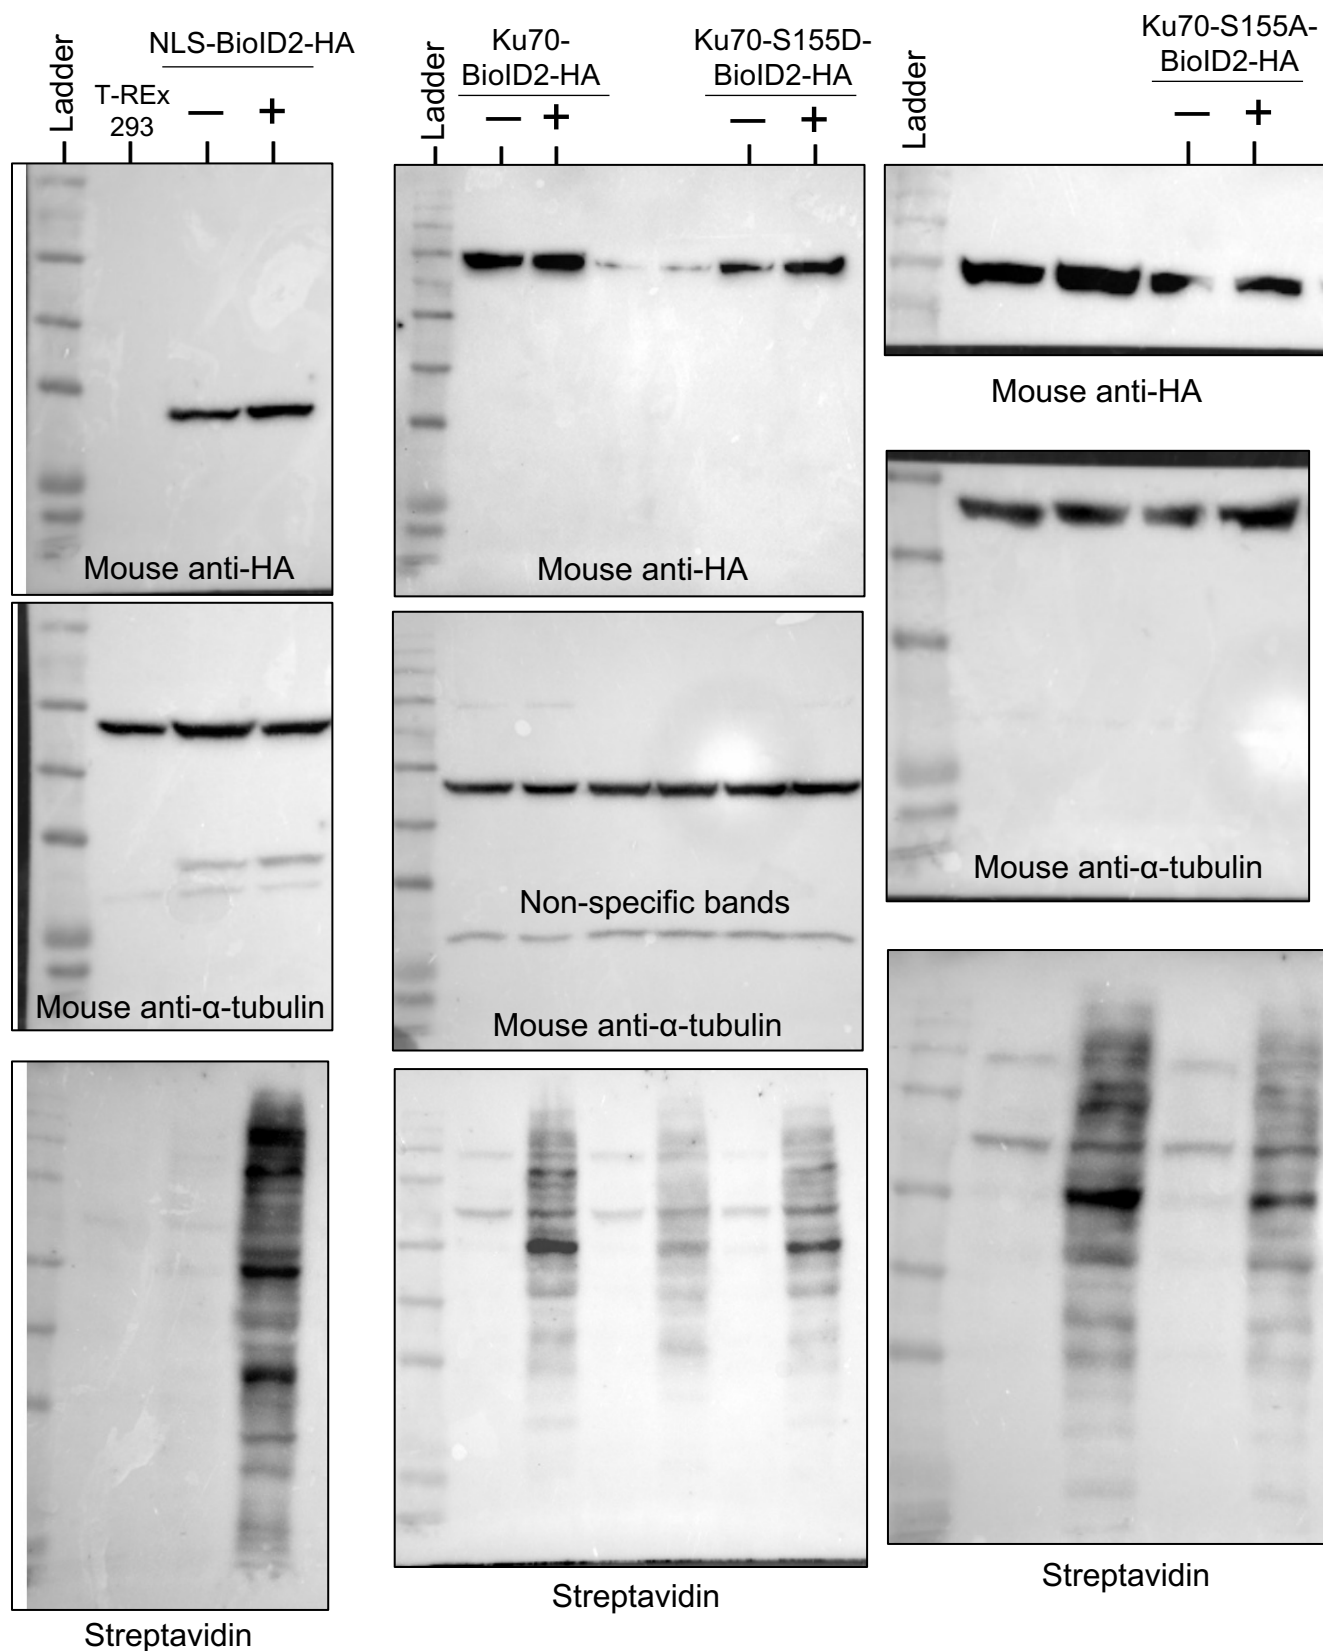

**Figure 3a.** Western blot of inducible stable cell lines with and without 24 hr of doxycycline. All Western blots depicted show 50 µg of whole cell extracts (WCE).

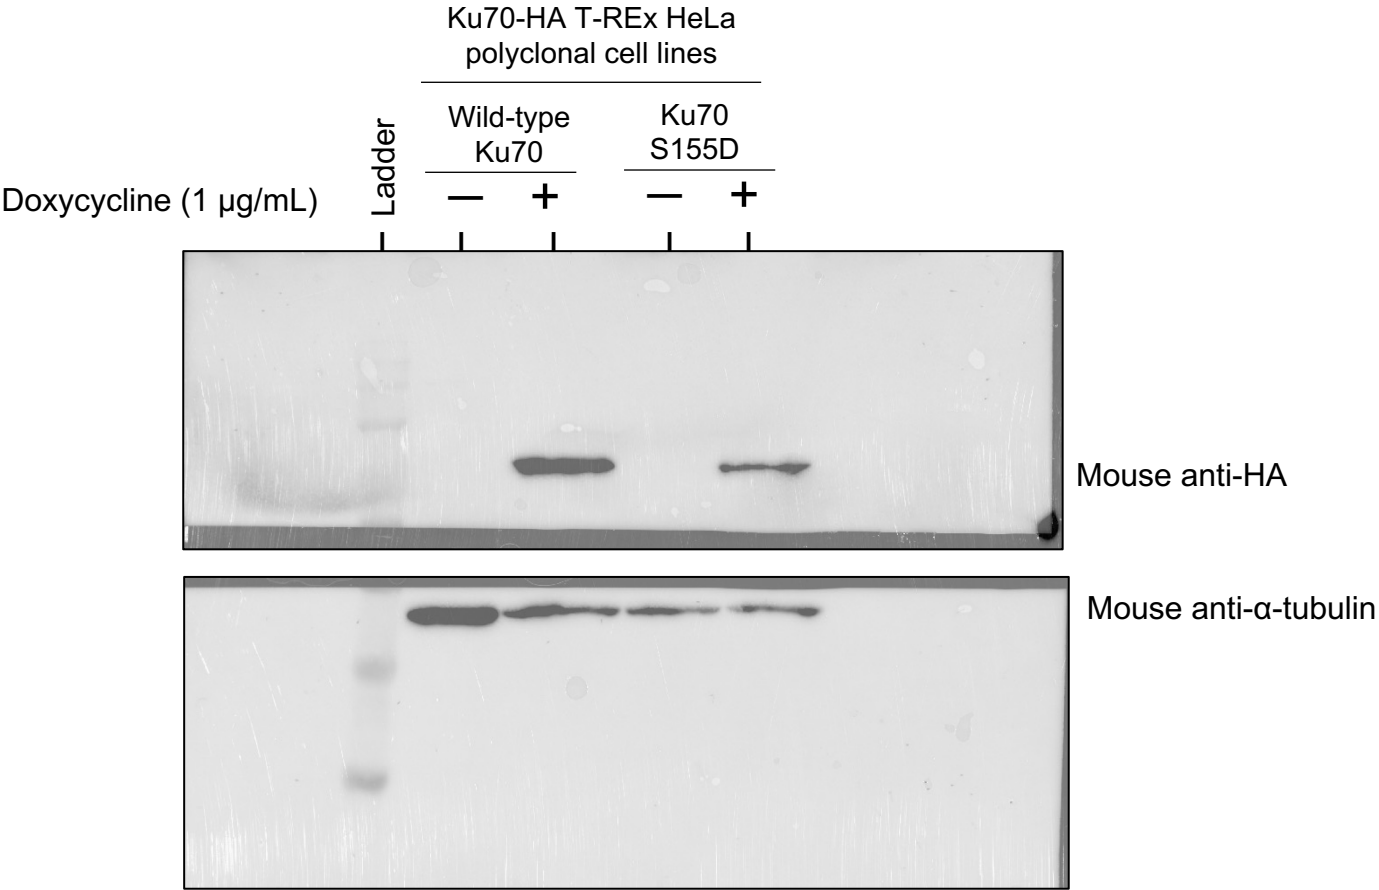

Note: Same blot probed with HA and α-tubulin

**Figure 3b.** Time course experiment showing the inducible expression of both polyclonal stable cell lines induced with doxycycline over a period of 24 hr. All Western blots depicted show 50  $\mu$ g of whole cell extracts (WCE), with or without doxycycline (1  $\mu$ g/mL).

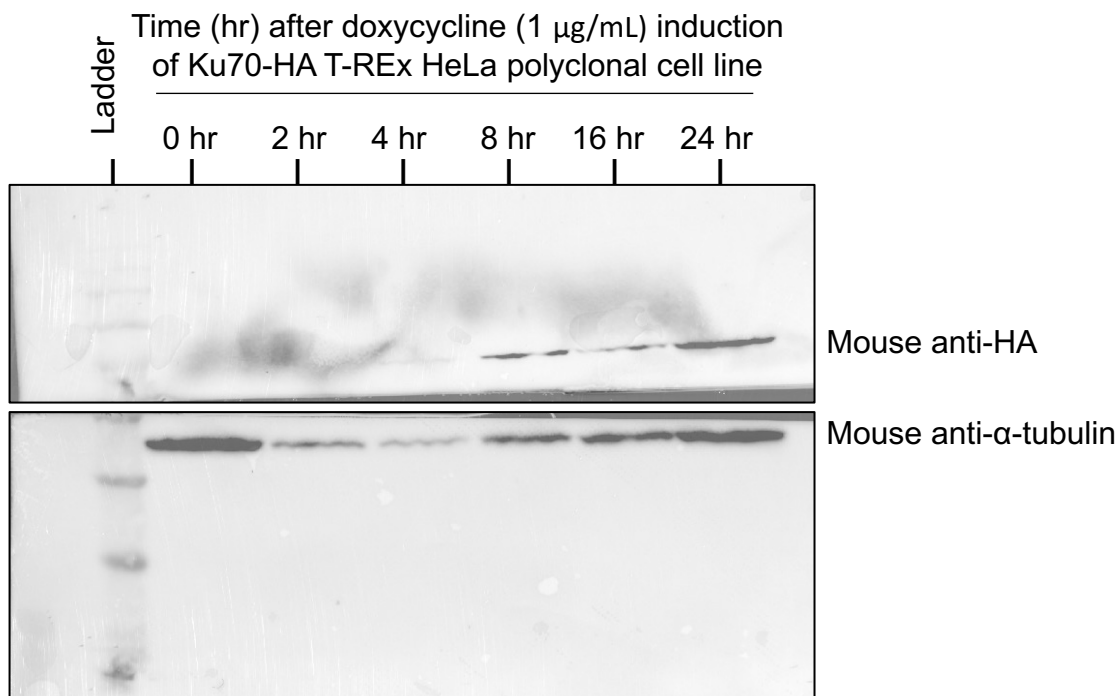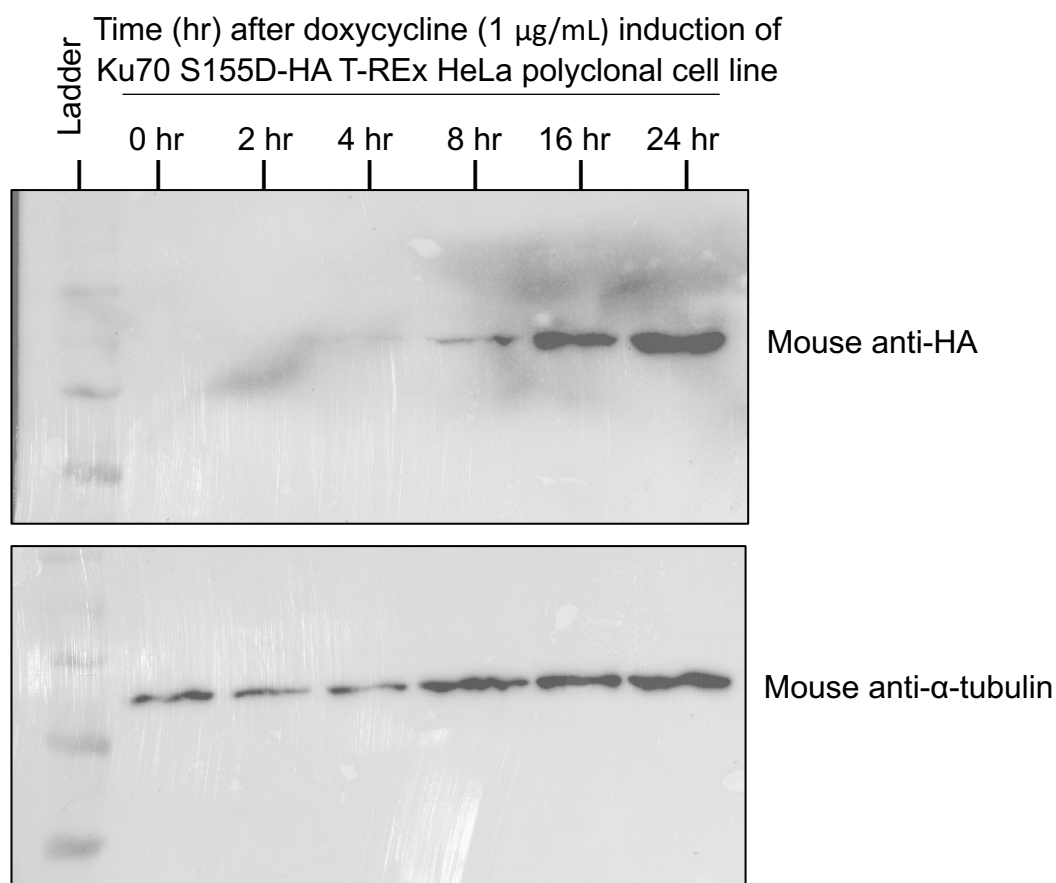

**Figure 6. Co-immunoprecipitation of Ku70 in HeLa cells treated with IR to produce DSBs:** Testing for an interaction between Ku70 and TRIP12. Co-immunoprecipitation conducted with 500µg of WCE in the presence or absence of 40gy IR.

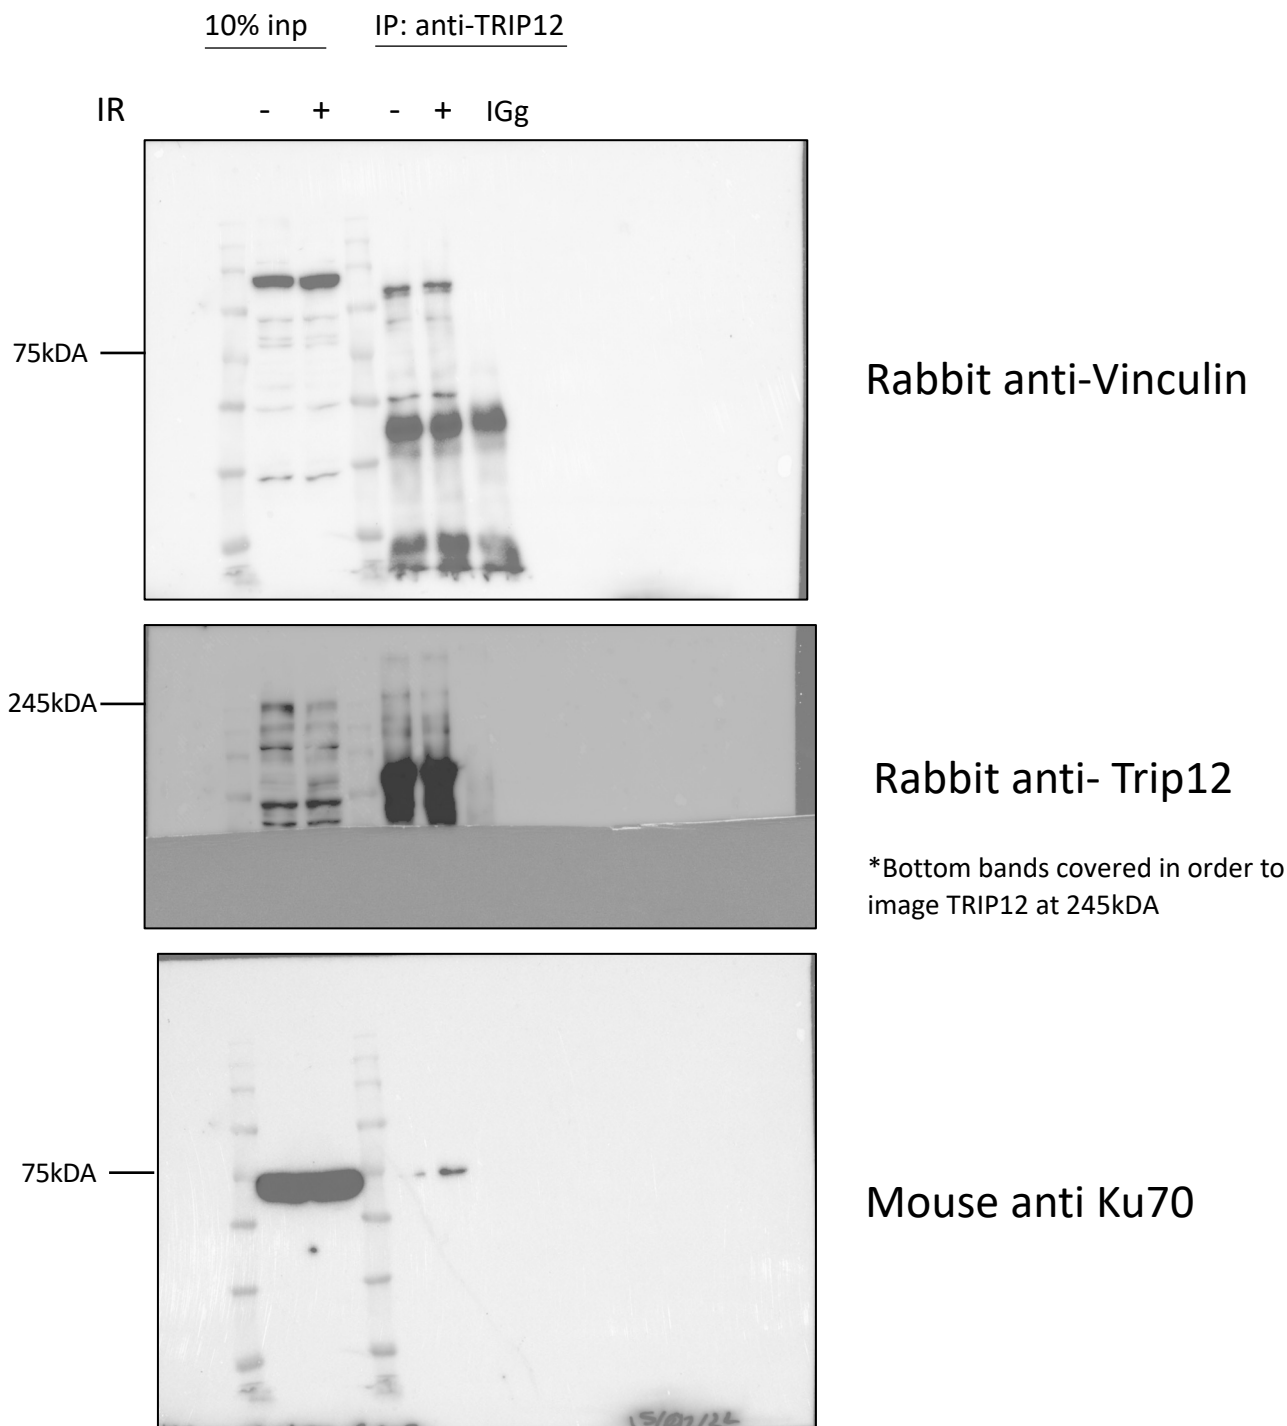

**Figure S4.** Doxycycline induction (1  $\mu\text{g/mL}$ ) of Ku70 S155A-HA

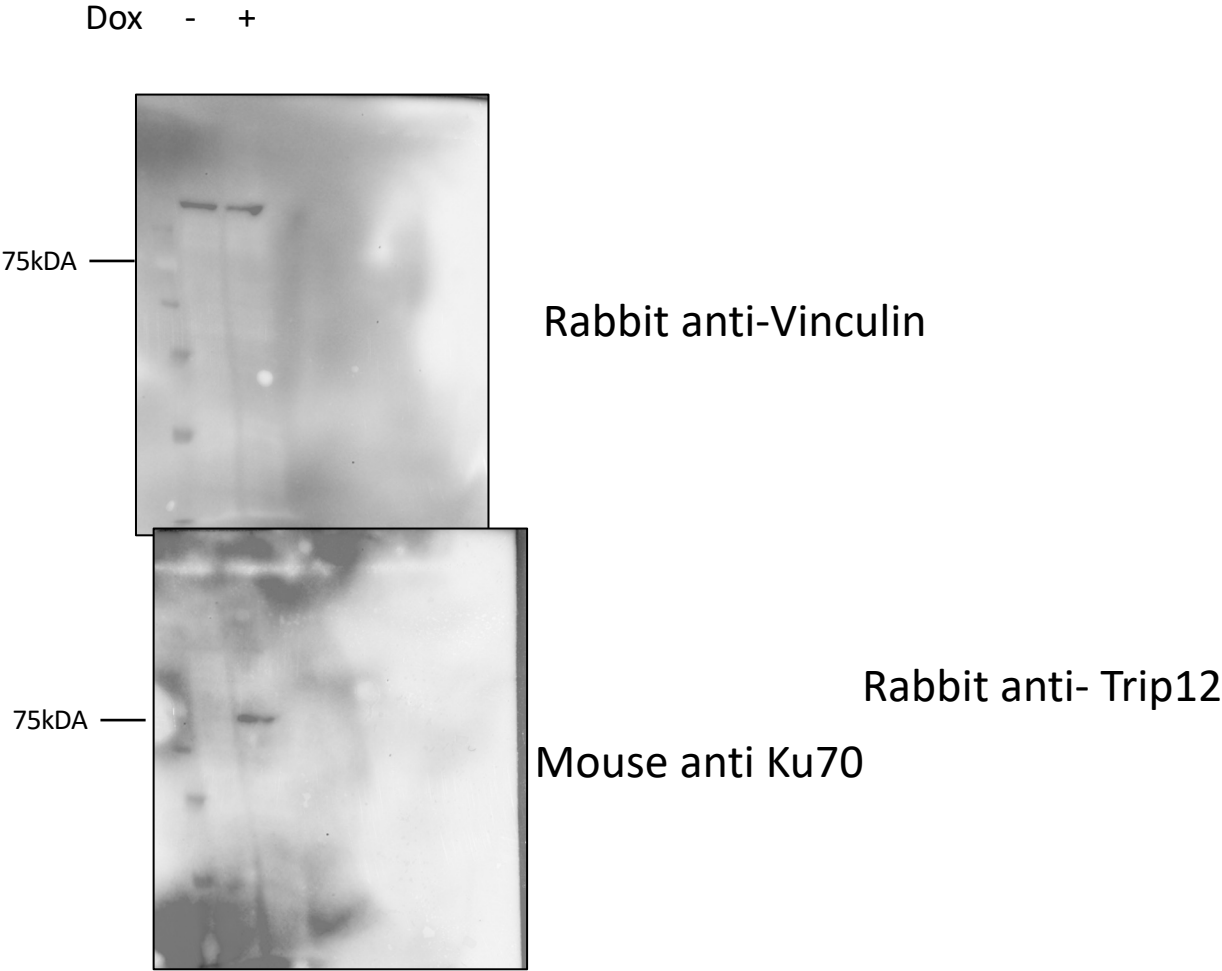

Supplement: s1 [file s1]
